# Supplementary material
Source: PubMed Central journal article supplement (PMC2926952)
Supplement: supp_dev.051250_DEV051250TableS1.pdf [file supp_dev.051250_DEV051250TableS1.pdf]

**Table S1. Notch signalling pathway genes are upregulated in neuroepithelial cells**

---

**Notch target genes**

---

*HLHm5* Hes/E(spl) type bHLH transcription factor

---

**Negative Delta regulators**

---

*Brd* Bearded gene  
*Tom* Bearded gene  
*Ocho* Bearded gene  
*BobA* Bearded gene  
*m4* Bearded gene

---

**Positive Notch modulators**

---

*fringe* UDP-glycosyltransferase  
*scabrous* Fibrogene related secreted protein  
*Gp150* Leucine-rich repeat transmembrane glycoprotein

---

**Proneural factors**

---

*lethal of scute* Mash1/Achaete-scute type bHLH transcription factor  
*scute* Mash1/Achaete-scute type bHLH transcription factor

---
