# Supplementary material
Source: PubMed Central journal article supplement (PMC2926952)

# Signal Sending Cell

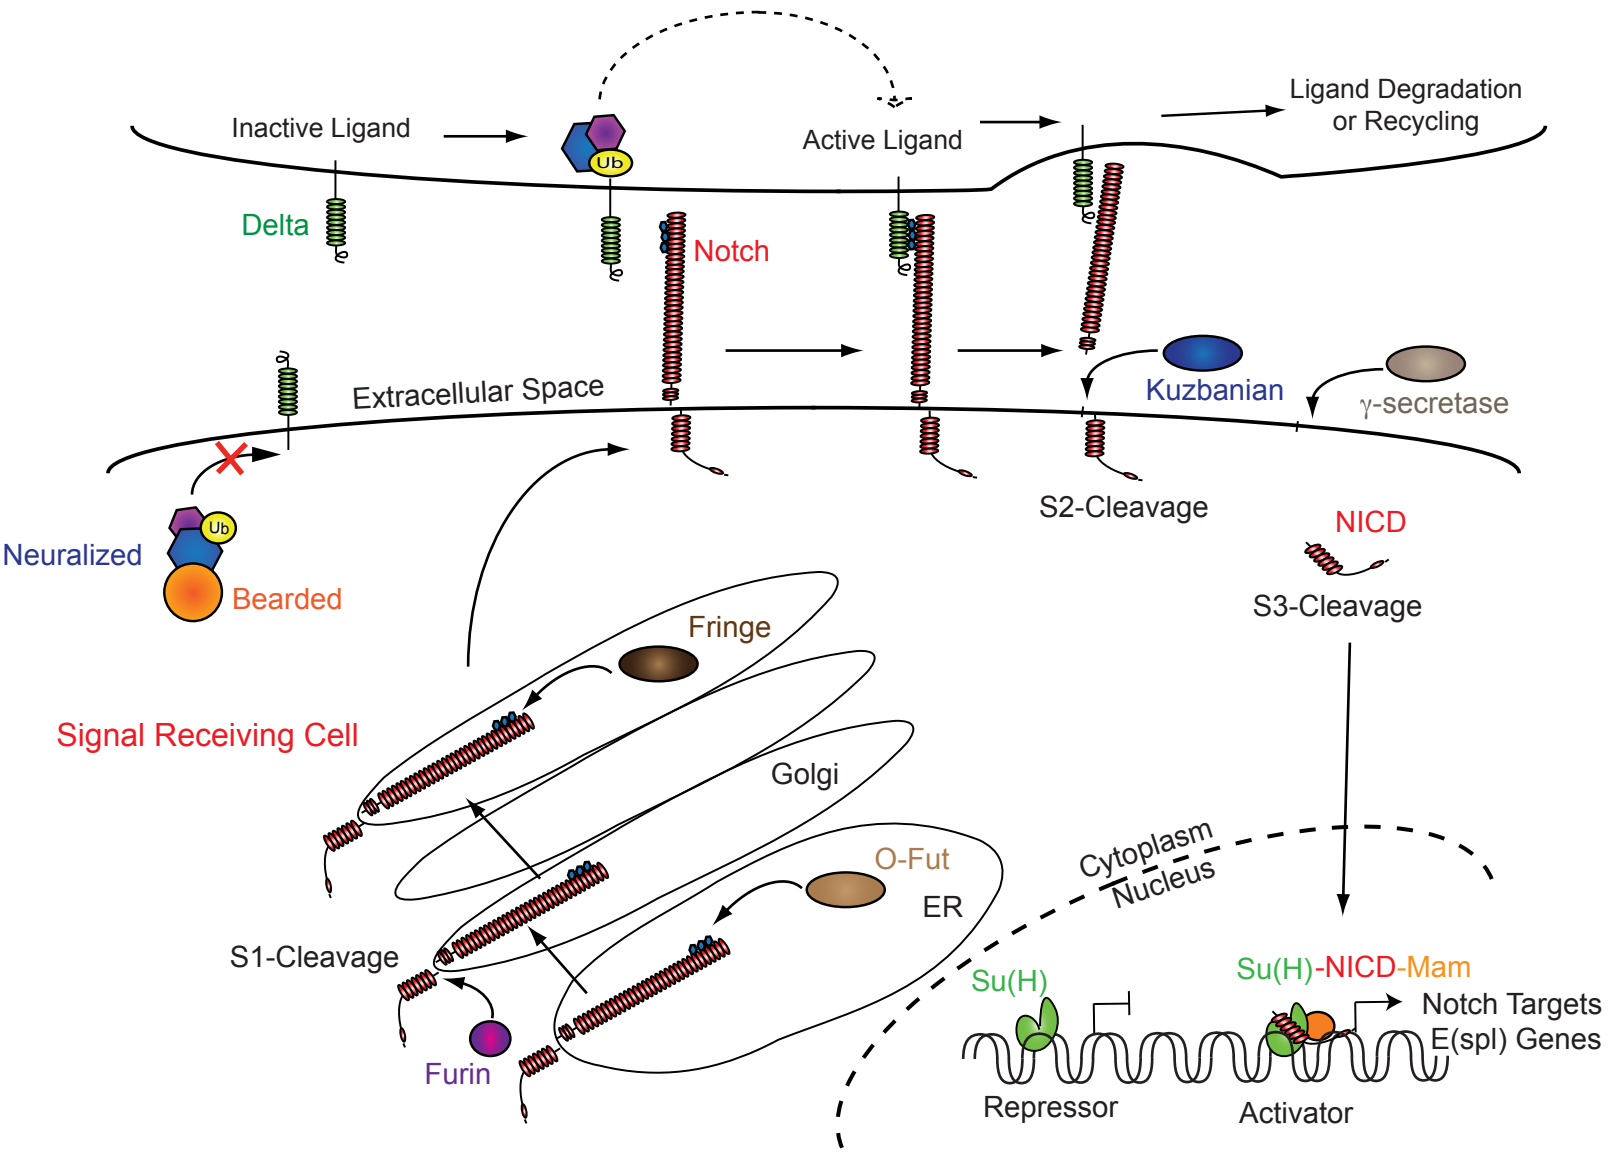

Supplement: supp_dev.051250_DEV051250FigS1.pdf [file supp_dev.051250_DEV051250FigS1.pdf]

(A)

OL NBs

NE

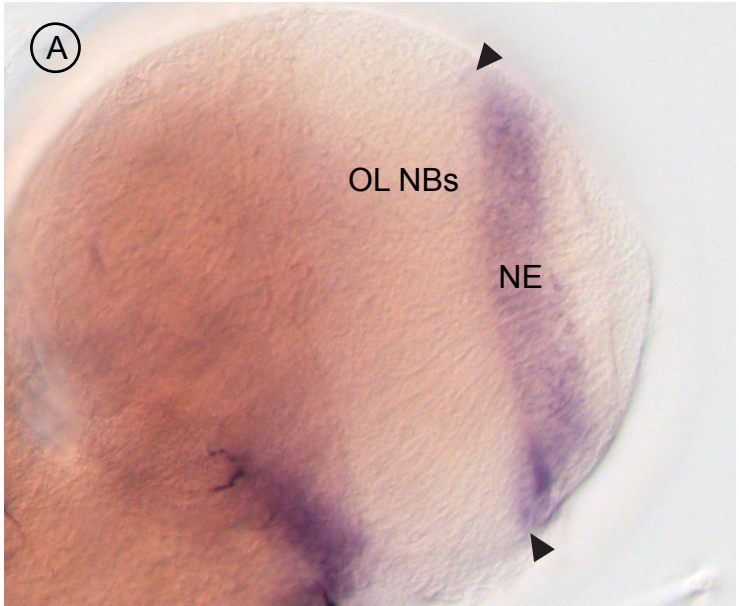

Supplement: supp_dev.051250_DEV051250FigS2.pdf [file supp_dev.051250_DEV051250FigS2.pdf]

Number of clones/optic lobe

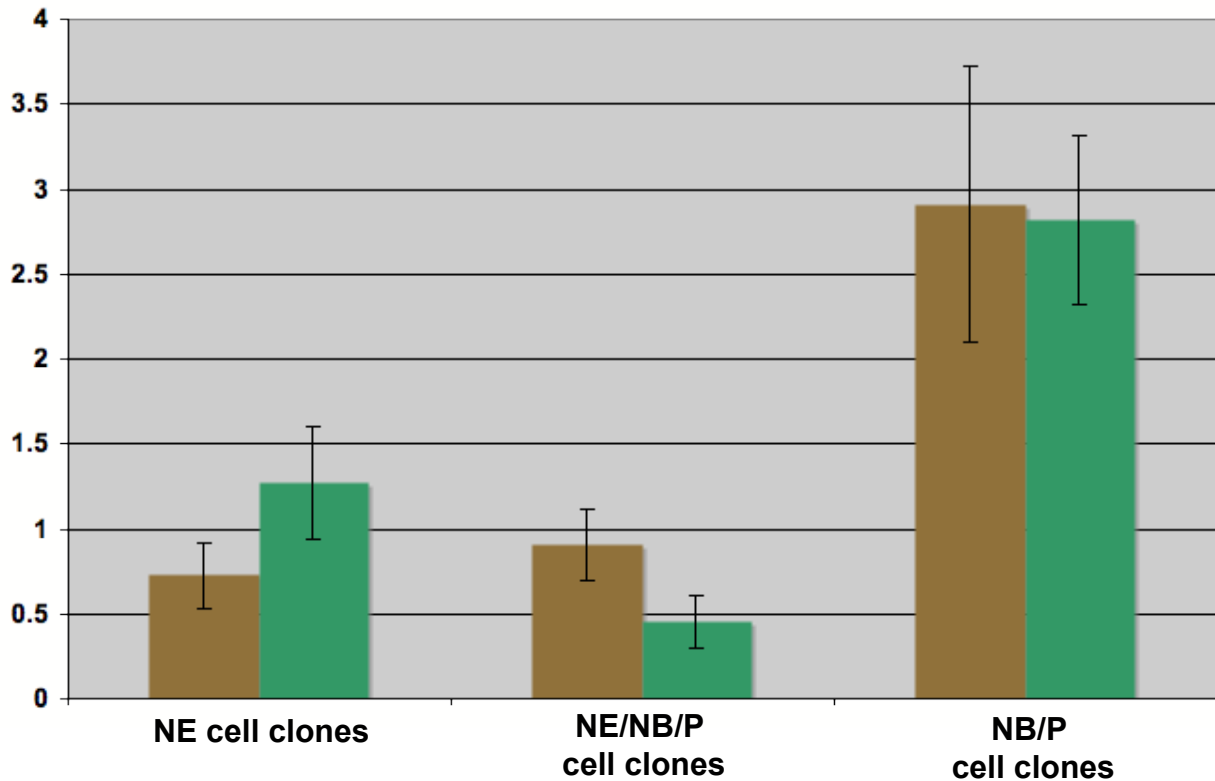

Control (n=11)

Notch [55e11] (n=11)

Supplement: supp_dev.051250_DEV051250FigS3.pdf [file supp_dev.051250_DEV051250FigS3.pdf]
